# Supplementary material
Source: publisher figshare collection journal article supplement (https://gsajournals.figshare.com/ndownloader/files/28534158)
Supplement: Supplementary file 1 [file 28534158]

## Sheet: Sheet1
Data type	Experimental species	Symbol/name used in publication	Source – public	Source – published	Source – unpublished	Identifiers	New reagent	Comments
Data type (mandatory) Duplicate rows as needed. Order is flexible, but row titles must be preserved.	Experimental species (mandatory, "NA" okay)	Symbol/name used in publication (mandatory)	Source – public [stock center; company, data repository] (one of D,E,F mandatory)	Source -- published [PMID or 'this paper'] (one of D,E,F mandatory)	Source – unpublished [description, incl. lab of origin] (one of D,E,F mandatory)	Identifiers [format as ID_source:identifier] Separate multiple entries with semi-colon, space	New reagent (mandatory for new entities) Description, progenitor(s)	Comments (optional) Genotypes, purpose of reagent, additional information
gene (source not applicable)	Drosophila melanogaster	CLAMP	NA	NA	NA
gene (source not applicable)	Drosophila melanogaster	Zelda/Zld	NA	NA	NA
gene (source not applicable)	Drosophila melanogaster	Bicoid/Bcd	NA	NA	NA
strain, strain_background	Drosophila melanogaster	egfpi/#41552	Bloomington Drosophila Stock Center			BDSC: 41552, RRID:BDSC_41552
strain, strain_background	Drosophila melanogaster	clampi1/#27080	Bloomington Drosophila Stock Center			BDSC: 27080, RRID:BDSC_27080
strain, strain_background	Drosophila melanogaster	clampi/#57008	Bloomington Drosophila Stock Center			BDSC: 57008, RRID:BDSC_57008
strain, strain_background	Drosophila melanogaster	clampi/#57163	Bloomington Drosophila Stock Center			BDSC: 57163, RRID:BDSC_57163
strain, strain_background	Drosophila melanogaster	zldi/#42016	Bloomington Drosophila Stock Center			BDSC: 42016, RRID:BDSC_42016
strain, strain_background	Drosophila melanogaster	bcdi1/#33886	Bloomington Drosophila Stock Center			BDSC: 33886, RRID:BDSC_33886
strain, strain_background	Drosophila melanogaster	bcdi2/#35478	Bloomington Drosophila Stock Center			BDSC: 35478, RRID:BDSC_35478
strain, strain_background	Drosophila melanogaster	mat-tubulin-GAL4/67.15			Eric Wieschaus
strain, strain_background	Drosophila melanogaster	Maternal Triple Driver-GAL4/MTD-GAL4	Bloomington Drosophila Stock Center			BDSC: 31777, RRID:BDSC_31777
strain, strain_background	Drosophila melanogaster	w1						Wildtype stock
antibody	mouse	anti-Sex lethal (Sxl)	Developmental Studies Hybidoma Bank			DSHB: M18, RRID:AB_528464		Used 1:10
antibody	mouse	anti-Even Skipped (Eve)	Developmental Studies Hybidoma Bank			DSHB: 3C10, RRID:AB_528229		Used 1:10
antibody	mouse	anti-Peanut (Pnut)	Developmental Studies Hybidoma Bank			DSHB: 4C9H4, RRID:AB_528429		Used 1:10
antibody	mouse	anti-Neurotactin (Nrt)	Developmental Studies Hybidoma Bank			DSHB: BP 106, RRID:AB_528404		Used 1:10
antibody	rabbit	anti-phospho-H3 (pH3)	Millipore-Sigma			Millipore: 06-570, RRID:AB_310177		Used 1:500
antibody	rabbit	anti-CLAMP		PMID: 22844249	Erica Larschan			Used 1:1000
antibody	rabbit	anti-Centrosomin (Cnn)			Thom Kaufmann			Used 1:500
antibody	guinea pig	anti-Giant (Gt)			Eric Wieschaus			Used 1:1000
antibody	rat	anti-Buttonhead (Btd)			Eric Wieschaus			Used 1:500
antibody	rat	anti-Bicoid (Bcd)			Eric Wieschaus			Used 1:1000
antibody	goat	anti-mouse Alexa 488	Invitrogen			Invitrogen: A32723, RRID:AB_2633275		Used 1:500
antibody	goat	anti-rabbit Alexa 546	Invitrogen			Invitrogen: A-11035, RRID:AB_143051		Used 1:500
antibody	goat	anti-rabbit Alexa 647	Invitrogen			Invitrogen: A21245, RRID:AB_2535813		Used 1:500
antibody	goat	anti-rat Alexa 488	Invitrogen			Invitrogen: A-11006, RRID:AB_141373		Used 1:500
antibody	goat	anti-rat Alexa 546	Invitrogen			Invitrogen: A11081, RRID:AB_2534125		Used 1:500
antibody	goat	anti-guinea pig Alexa 647	Invitrogen			Invitrogen: A-21450, RRID:AB_2735091		Used 1:500
antibody	goat	Peroxidase AffiniPure Goat Anti-Mouse IgG	Jackson Immunoresearch Laboratories			Jackson Immunoresearch Laboratories: 115-035-166, RRID:AB_2338511		Used 1:1000
antibody	goat	Rabbit Peroxidase-Anti-Peroxidase	Jackson Immunoresearch Laboratories			Jackson Immunoresearch Laboratories: 323-005-024, RRID:AB_2315781		Used 1:1000
sequence-based reagent	Drosophila melanogaster	Sxl smFISH probes			Thomas Gregor
sequence-based reagent	Drosophila melanogaster	eve smFISH probes			Shawn Little
sequence-based reagent	Drosophila melanogaster	run smFISH probes			Thomas Gregor
sequence-based reagent	Drosophila melanogaster	btd smFISH probes			Thomas Gregor
large-scale dataset	Drosophila melanogaster	CLAMP/Zld zygotic Knockdown RNA-seq		This paper
large-scale dataset	Drosophila melanogaster	Rieder et al. 2017 embryonic CLAMP ChIP-seq		PMID: 28838946
large-scale dataset	Drosophila melanogaster	Rieder et al. 2017 CLAMP maternal knockdown RNA-seq		PMID: 28838946
large-scale dataset	Drosophila melanogaster	Liang et al. 2008 zld germline clone microarray data		PMID: 18931655
large-scale dataset	Drosophila melanogaster	McDaniel et al. 2019 OptoZld RNA-seq		PMID: 30797686
other	NA	Hoescht	Thermo Fisher			Fisher Scientific: H3570		Used 3µg/mL
other	NA	Polysciences Aqua Poly/mount	Polysciences			Polysciences: 18606-20
